# Supplementary material
Source: publisher site journal article supplement (https://www.degruyter.com/publication/isbn/9783110767971/downloadAsset/9783110767971_Fig6.pdf)

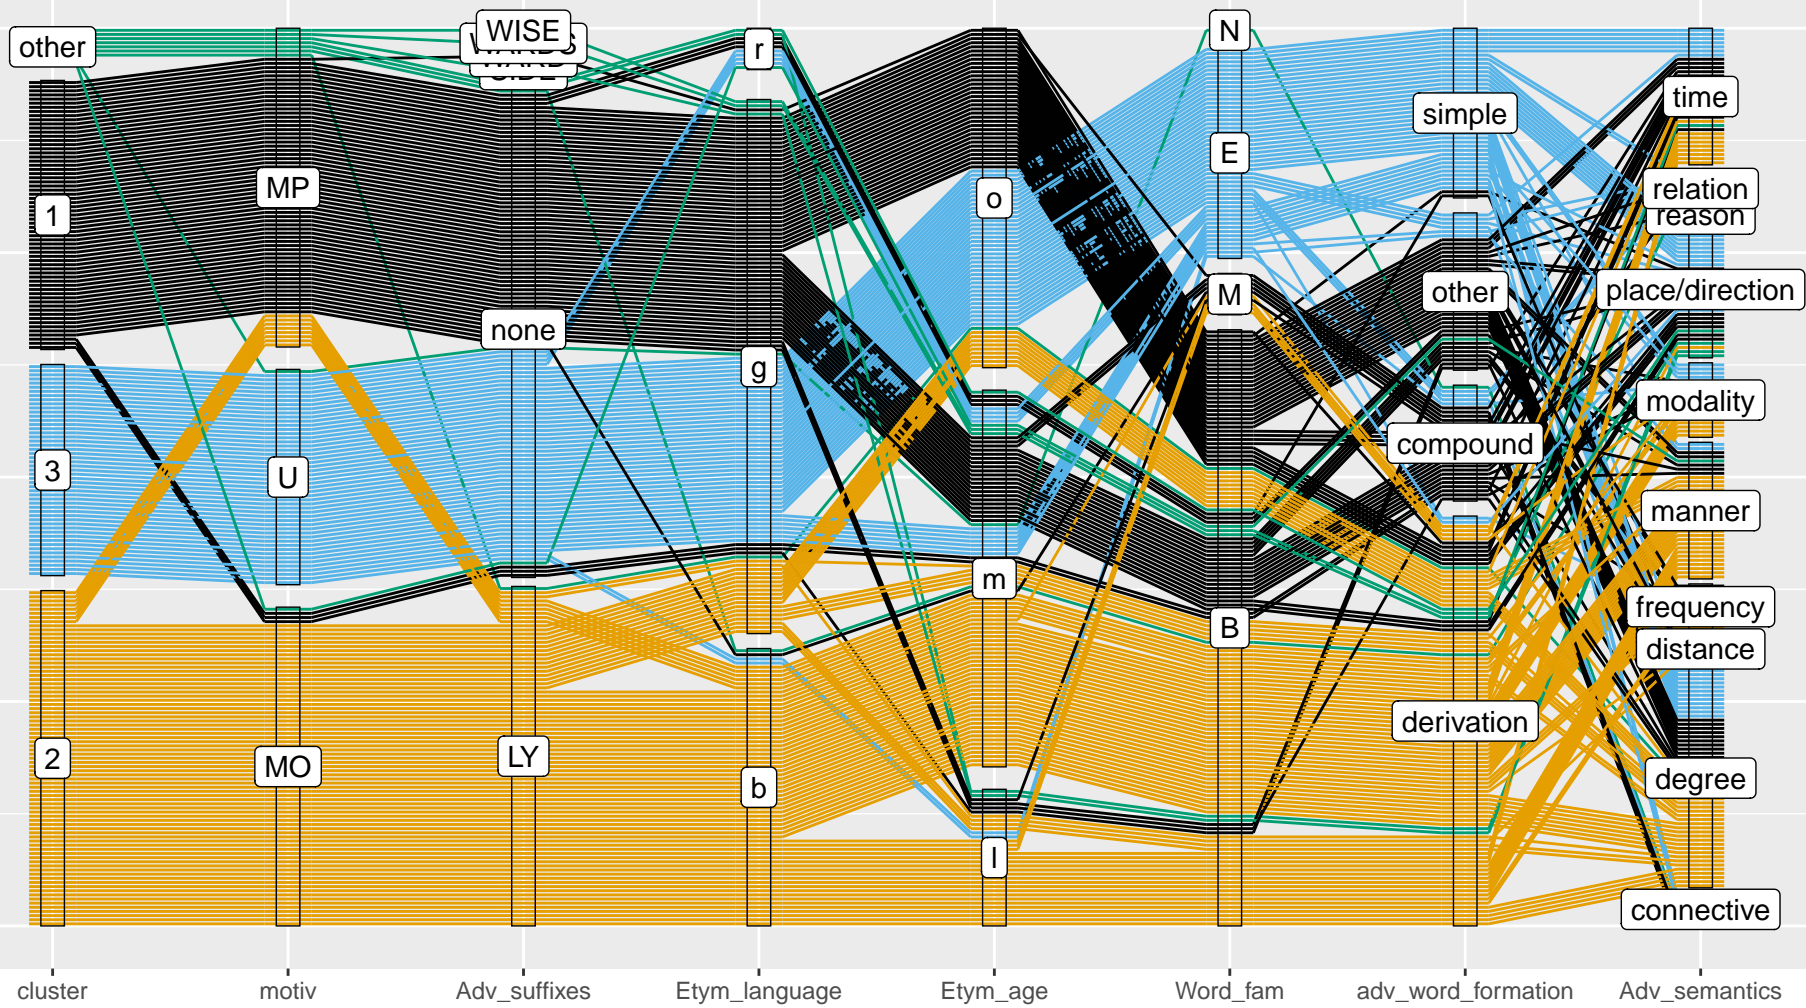

Cluster ● 1 ● 2 ● 3 ● other

Supplement: Supplementary file 1 [file 9783110767971_Fig6.pdf]
